# Supplementary material
Source: publisher figshare collection journal article supplement (https://acs.figshare.com/ndownloader/files/10912511)
Supplement: Supplementary file 1 [file 10912511]

## Supporting Information

### A Systematic Study of Oxygen Evolution Activity and Stability on $\text{La}_{1-x}\text{Sr}_x\text{FeO}_{3-\delta}$ Perovskite Electrocatalysts in Alkaline Media

*Sixuan She<sup>†</sup>, Jie Yu<sup>†</sup>, Wanqi Tang<sup>†</sup>, Yinlong Zhu<sup>†</sup>, Yubo Chen<sup>‡</sup>, Jaka Sunarso<sup>§</sup>, Wei*

*Zhou<sup>\*,†</sup> and Zongping Shao<sup>\*,†,||</sup>*

<sup>†</sup>Jiangsu National Synergetic Innovation Center for Advanced Materials (SICAM), State Key Laboratory of Materials-Oriented Chemical Engineering, College of Chemical Engineering, Nanjing Tech University, No.5 Xin Mofan Road, Nanjing 210009, P.R. China. \*E-mail: zhouwei1982@njtech.edu.cn. \*E-mail: shaozp@njtech.edu.cn.

<sup>‡</sup>School of Material Science and Engineering, Nanyang Technological University, 50 Nanyang Avenue, Singapore 639798, Singapore.

<sup>§</sup>Faculty of Engineering, Computing and Science, Swinburne University of Technology, Jalan Simpang Tiga, Kuching 93350, Sarawak, Malaysia.

<sup>||</sup>Department of Chemical Engineering, Curtin University, Perth, WA 6845, Australia.

## I. Supporting Results

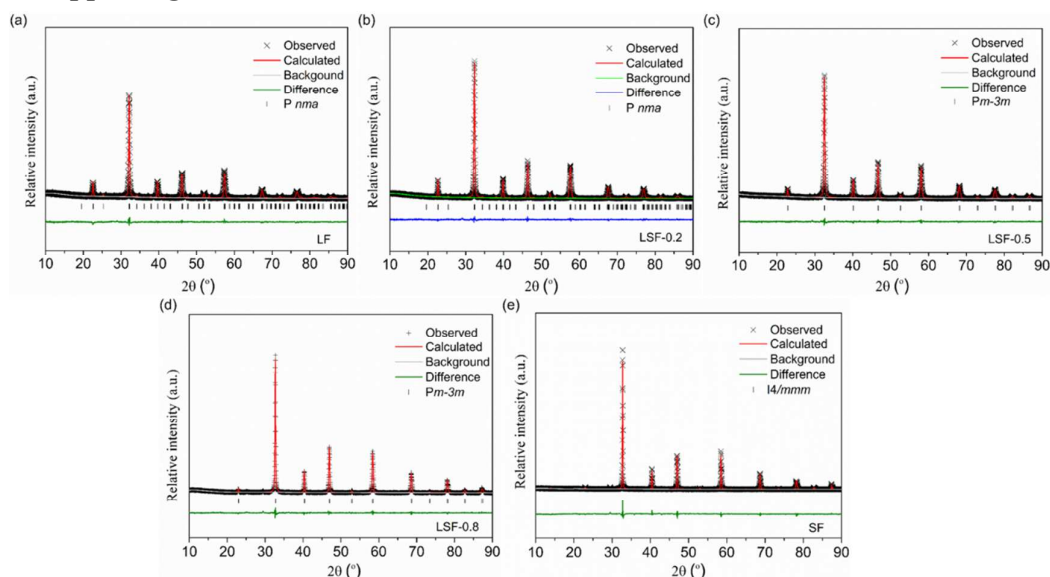

**Figure S1** Rietveld refinements plots of the powder X-ray diffraction patterns of the  $\text{La}_{1-x}\text{Sr}_x\text{FeO}_{3-\delta}$  ( $x = 0, 0.2, 0.5, 0.8$ , and  $1$ ) powders, i.e. (a) LF; (b) LSF-0.2; (c) LSF-0.5; (d) LSF-0.8; (e) SF.

**Table S1** The oxidation state of Fe and the oxygen non-stoichiometry of the  $\text{La}_{1-x}\text{Sr}_x\text{FeO}_{3-\delta}$  ( $x = 0, 0.2, 0.5, 0.8$ , and  $1$ ) powders from iodometric titrations.

| Composition | Oxidation state of Fe | $\delta$ |
|-------------|-----------------------|----------|
| LF          | 2.98                  | 0.01     |
| LSF-0.2     | 3.12                  | 0.04     |
| LSF-0.5     | 3.13                  | 0.18     |
| LSF-0.8     | 3.10                  | 0.35     |
| SF          | 3.09                  | 0.46     |

**Table S2** Brunauer-Emmett-Teller specific surface area of the  $\text{La}_{1-x}\text{Sr}_x\text{FeO}_{3-\delta}$  ( $x = 0, 0.2, 0.5, 0.8$ , and  $1$ ) powders.

| Samples | $a_{s,\text{BET}}$ ( $\text{m}^2 \text{g}^{-1}$ ) |
|---------|---------------------------------------------------|
| LF      | 5.6                                               |
| LSF-0.2 | 6.0                                               |
| LSF-0.5 | 9.0                                               |
| LSF-0.8 | 11.5                                              |
| SF      | 2.0                                               |

**Table S3** The relative amounts of the different Fe species of the  $\text{La}_{1-x}\text{Sr}_x\text{FeO}_{3-\delta}$  ( $x = 0, 0.2, 0.5, 0.8$ , and 1) powders.

| Samples | $\text{Fe}^{4+}$ (%) | $\text{Fe}^{3+}$ (%) | $\text{Fe}^{2+}$ (%) | Average valance |
|---------|----------------------|----------------------|----------------------|-----------------|
| LF      | 6.51                 | 31.35                | 62.14                | 2.44            |
| LSF-0.2 | 7.93                 | 30.18                | 61.89                | 2.46            |
| LSF-0.5 | 11.23                | 32.04                | 56.73                | 2.54            |
| LSF-0.8 | 12.52                | 30.97                | 56.51                | 2.56            |
| SF      | 13.60                | 32.01                | 54.39                | 2.59            |

**Table S4** The relative amounts of the four different surface oxygen species of the  $\text{La}_{1-x}\text{Sr}_x\text{FeO}_{3-\delta}$  ( $x = 0, 0.2, 0.5, 0.8$ , and 1) powders.

| Composition | $\text{O}^{2-}$ (%) | $\text{O}_2^{2-}/\text{O}^-$ (%) | $\text{OH}^-/\text{O}_2$ (%) | $\text{H}_2\text{O}$ (%) |
|-------------|---------------------|----------------------------------|------------------------------|--------------------------|
| LF          | 39.09               | 9.26                             | 44.62                        | 7.03                     |
| LSF-0.2     | 36.07               | 15.56                            | 39.98                        | 8.40                     |
| LSF-0.5     | 26.79               | 22.47                            | 36.88                        | 13.86                    |
| LSF-0.8     | 19.59               | 31.30                            | 41.38                        | 7.73                     |
| SF          | 14.037              | 24.02                            | 54.52                        | 7.43                     |

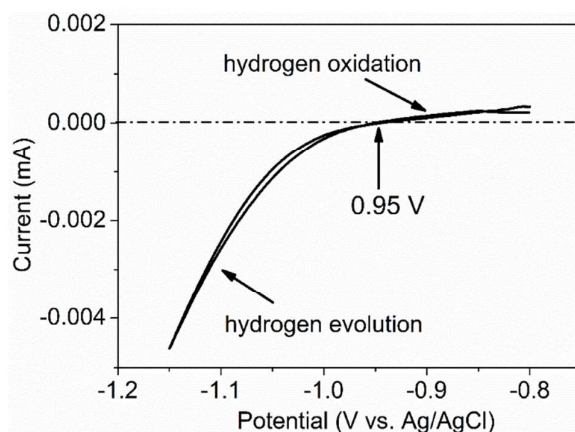

**Figure S2** Potential calibration of the reference electrode (Ag/AgCl) in 0.1 M KOH solution. The potentials were calibrated by the following equation:  $V_{\text{RHE}} = V_{\text{Ag/AgCl}} + 0.95 \text{ V}$ .

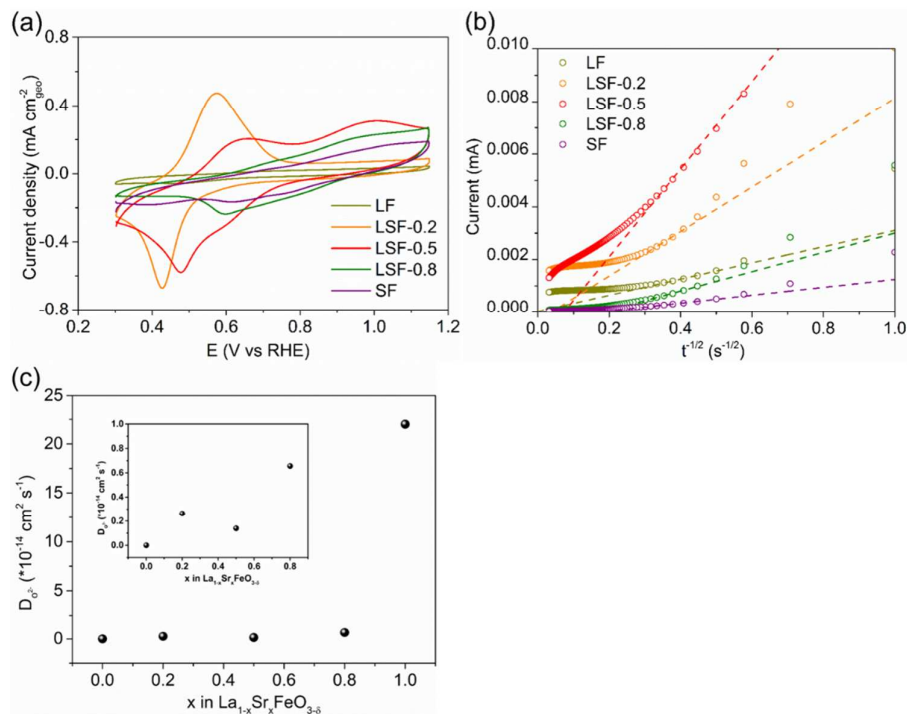

**Figure S3** (a) Cyclic voltammetry for the La<sub>1-x</sub>Sr<sub>x</sub>FeO<sub>3-δ</sub> (x = 0, 0.2, 0.5, 0.8, and 1) samples obtained at 20 mV s<sup>-1</sup> scan rate in an Ar-saturated 6 M KOH solution; (b) Current versus t<sup>-1/2</sup> for the La<sub>1-x</sub>Sr<sub>x</sub>FeO<sub>3-δ</sub> (x = 0, 0.2, 0.5, 0.8, and 1) powders; and (c) Oxygen ionic diffusion rate measured from chronoamperometric test at 25 °C. Inset figure displays the oxygen ionic diffusion rate values more clearly for LF, LSF-0.2, LSF-0.5, and LSF-0.8.

The oxygen ions electrochemical insertion and removal (redox) reactions of the 800 °C calcined La<sub>1-x</sub>Sr<sub>x</sub>FeO<sub>3-δ</sub> (x = 0, 0.2, 0.5, 0.8, and 1) powders were probed using cyclic voltammetry (CV) in an Ar-saturated 6 M KOH solution; the results of which are shown in **Figure S3a**. The positions of the redox peaks are shifted to higher potentials with an increase in Sr<sup>2+</sup> content (x) and an increase in oxygen non-stoichiometry (that typically represents the amount of oxygen vacancies) (**Table S1**). Such shift indicates faster oxygen ionic diffusion rate.

The diffusion rate of oxygen ions of LF, LSF-0.2, LSF-0.5, LSF-0.8, and SF were measured by chronoamperometric tests using a bounded 3D solid-state diffusion model with an RDE at 1600 rpm rotation rate in an Ar-saturated 6 M KOH solution.<sup>1</sup> As shown in **Figure S3b**, the intersection of i vs. t<sup>-1/2</sup> at I = 0 corresponds to λ = a/(Dt)<sup>1/2</sup>, where λ is a dimensionless shape factor, a is the radius of the particle, D is the diffusion rate, and t<sup>-1/2</sup>. Given a, and an appropriate shape factor, λ, the diffusion

rate can be measured. In this case,  $\lambda$  was chosen as 2, which is representative of a rounded parallelepiped, halfway between the values for a sphere ( $\lambda = 1.77$ ) and a cube ( $\lambda = 2.26$ ). The value of  $a$  is calculated according to the relation of the surface area to particle size for a sphere:  $SA = 6/2ap$ , where  $p$  is the density of LSF-x. The crystallite sizes ( $a$ ) of these five samples vary from 9 nm to 55.2 nm due to their different BET surface areas and crystal structures (**Table S4**). As a precaution note, it is more valid to compare diffusion rate for samples with similar crystallite size such as LSF to LSF-0.2 and LSF-0.5 to LSF-0.8. For example, at room temperature, LSF-0.8 that has an oxygen non-stoichiometry ( $\delta$ ) of 0.35 has an oxygen diffusion rate ( $D$ ) of  $4.5 \cdot 10^{-15} \text{ cm}^2 \text{ s}^{-1}$ , which is higher than that for LSF-0.5 of  $1.4 \cdot 10^{-15} \text{ cm}^2 \text{ s}^{-1}$  with an oxygen non-stoichiometry ( $\delta$ ) of 0.18 (**Figure S3c**).

## References

1. Mefford, J. T.; Rong, X.; Abakumov, A. M.; Hardin, W. G.; Dai, S.; Kolpak, A. M.; Johnston, K. P.; Stevenson, K. J. Water Electrolysis on  $\text{La}_{1-x}\text{Sr}_x\text{CoO}_{3-\delta}$  Perovskite Electrocatalysts. *Nat. Commun.* **2016**, 7, 11053.
